# Supplementary material
Source: ML conference proceedings conference paper supplement (https://openaccess.thecvf.com/content/CVPR2023/html/Azinovic_High-Res_Facial_Appearance_CVPR_2023_paper.html)
Supplement: Supplementary file 1 [file Azinovic_High-Res_Facial_Appearance_CVPR_2023_supplemental.zip]

Archive with 2 entries (2 files):
- 5167_supp.mp4
- 5167_supp.pdf
